# Supplementary material for: Nanogold-coated stent facilitated non-invasive photothermal ablation of stent thrombosis and restoration of blood flow
Source: Royal Society of Chemistry journal article supplement (doi:10.1039/d3na00751k), 2024-01-01
Supplement: d3na00751k1.pdf [file d3na00751k1.pdf]

1 **Supplementary information:**

2 **Materials and Methods:**

3

4 **Raman scattering:** The Raman spectra of the thermogenic stent were acquired using a Witec Alpha  
5 300 RAS microspectrometer with excitation wavelengths of 532 nm and 633 nm, generated by an  
6 Ar<sup>+</sup> laser and a semiconductor laser, respectively <sup>52</sup>. Raman measurements were conducted on the  
7 Raman microscope (WITec) with an excitation wavelength of 785 nm and a detection range of 100–  
8 4000 cm<sup>-1</sup>. Spectra were collected using a 50X magnification objective lens (Zeiss), and data  
9 acquisition involved an integration time of 30s and 2 accumulations. The acquired spectra were  
10 processed using WITec Project FOUR and GraphPad Prism software.

11 **Fourier-transform infrared spectroscopy (FTIR):** ATR-FTIR spectra of coated thermogenic stent  
12 were obtained using a Nicolet 6700 FTIR spectrometer (Thermo Fisher Scientific) equipped with a  
13 GladiATR module (PIKE Technologies) and a diamond crystal with a contact area of 0.5 mm<sup>2</sup> <sup>53,54</sup>.  
14 Spectra were recorded in the 4000–400 cm<sup>-1</sup> range with a 4 cm<sup>-1</sup> resolution and atmospheric  
15 correction switched on at room temperature (25°C). Spectra were generated using OMNIC software  
16 as a mean of 34 scans from which the background spectrum was subtracted and further analyzed  
17 using Origin 2016 software.

18 **Scanning electron microscopy:** Fibrin clot was generated around the thermogenic stent and  
19 subjected to NIR irradiation for 30 min as described. Both control (no laser) and irradiated samples  
20 were fixed with glutaraldehyde/paraformaldehyde mix (1% each) for 24 h, followed by washing  
21 sequentially with 1X PBS and distilled water. Samples were frozen at –80°C for 3–4 h, lyophilized  
22 in a freeze-dryer for 6–8 h at –55 °C and desiccated prior to SEM analysis. Sputtering was carried  
23 out on mounted samples employing SEM sputter coater (Quorum Technologies, model SC7620),  
24 and change in surface morphology of fibrin clot was recorded using an analytical SEM (Zeiss, model  
25 EVO 18) in the high vacuum mode at an accelerating voltage of 10 kV. The diameter of the fibrin  
26 fibres and the thrombus-depleted areas were determined employing Image J analysis software.  
27 Samples were prepared in triplicate and 60 individual fibre diameters were evaluated from each SEM  
28 image.

29

30 **Confocal laser scanning microscopy:** Fluorescently labelled clot was generated around  
31 thermogenic stent using Alexa Fluor 488–conjugated fibrinogen, followed by exposure to NIR laser  
32 for 30 min. Samples were subjected to confocal microscopy (Zeiss, model LSM 700) in Z-stacking  
33 mode to analyse the 3-dimensional structure of fibrin clots at different depths. A 63X oil immersion  
34 objective with 1 AU pinhole size was employed to capture 3D images (excitation, 488 nm; emission,  
35 510 nm) using Zen imaging software. Fiber density (measured between two-parallel horizontal lines)

1 and thrombus-depleted areas in control and irradiated samples were analysed in single optical  
2 sections of different images using the Image J software and were plotted using GraphPad Prism  
3 software.

4

5 **Figures:**

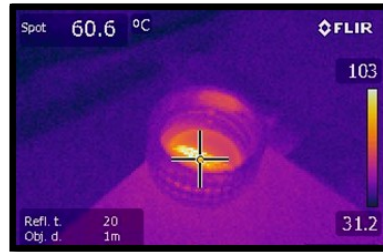

6

7 **Supplementary Figure 1. Infra-red thermal image of coated stent irradiated with 808 nm NIR laser.**  
8 The cursor within the panel represents spot temperature and the vertical pseudo-color bar signifies  
9 temperature intensity from high (yellow) to low (dark blue).

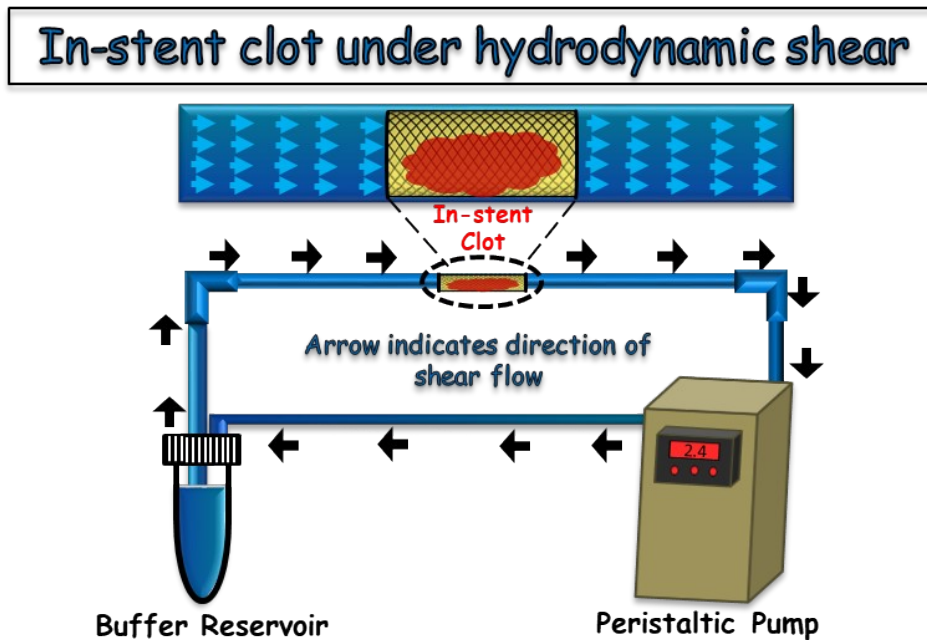

10

11 **Supplementary Figure 2.** Experimental set-up for the study of in-stent thrombolysis against arterial  
12 shear ( $1500 \text{ s}^{-1}$ ) under dynamic flow conditions.

13

14

15

16

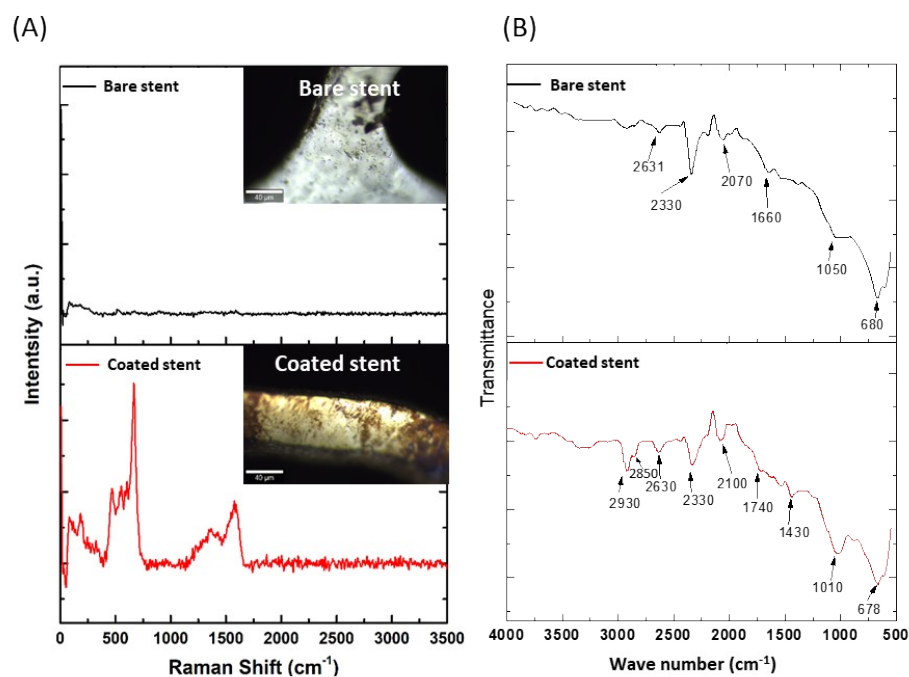

1  
2  
3  
4  
5  
6

**Supplementary Figure 3.** Raman spectra (panel A) and FTIR spectra (panel B) of bare metal (black) and coated (red) stents (scale, 40 μm).

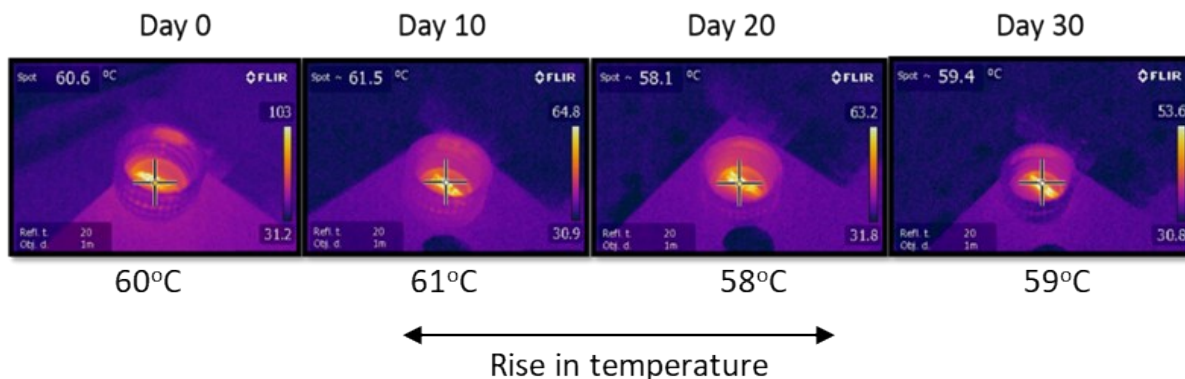

7  
8  
9  
10  
11  
12

**Supplementary Figure 4.** Infra-red thermal images of coated stent subjected to hydrodynamic shear at 1500 s<sup>-1</sup> (arterial shear) from 0 to 30 days. Within each panel, the cursor represents spot temperature and the vertical pseudo-color bar signifies temperature intensity from high (yellow) to low (dark blue).

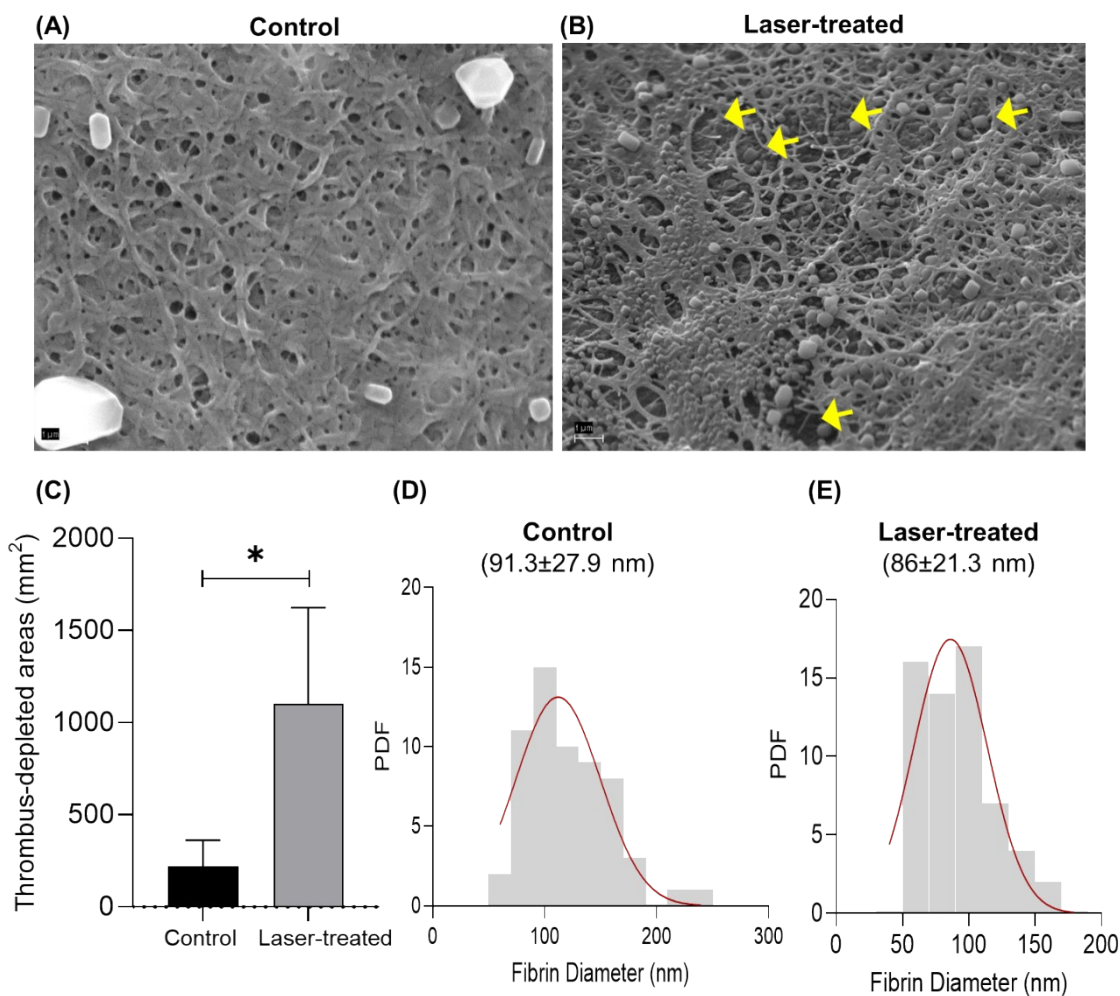

1  
2 **Supplementary Figure 5.** Scanning electron microscopy of in-stent / peri-stent clots exposed to  
3 NIR laser for 30 min. Clots were generated by adding 2.5 mM CaCl<sub>2</sub> and 1 U/ml thrombin to solution  
4 of fibrinogen (1 mg/ml) carrying the thermogenic stents, followed by irradiation with NIR (808 nm)  
5 laser at power density 1.05 W/cm<sup>2</sup>. A and B, SEM images of clots in control and laser-irradiated  
6 samples (scale, 1 μm) exhibiting significant rarefaction of clots upon laser irradiation (arrows  
7 indicating thrombus-depleted areas). C, bar diagrams representing thrombus-depleted areas in  
8 control and irradiated samples analyzed. D and E, fibrin diameter calculated from 60 fibers in each  
9 image from control and laser-treated samples (PDF, probability density function of the distribution).  
10 Data are representative of three different sets of experiments (mean ± SEM). \*P < 0.05 vs Control.  
11

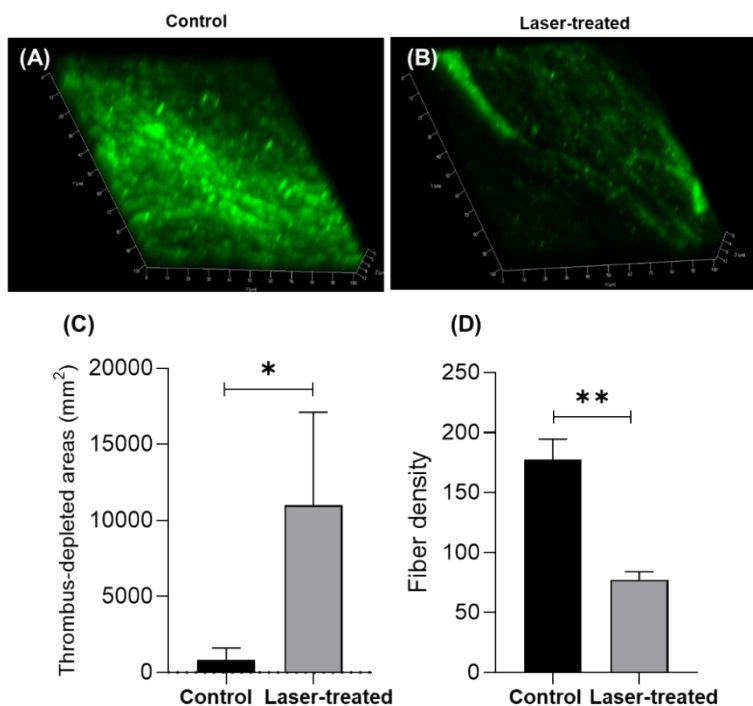

1  
 2 **Supplementary Figure 6.** Confocal microscopy of in-stent / peri-stent fluorescently labelled fibrin  
 3 clots subjected to NIR laser irradiation. A and B, z-stack (6-16  $\mu\text{m}$ ) images of control and laser-  
 4 treated samples exhibiting upon laser irradiation. C, bar diagrams representing thrombus-depleted  
 5 areas in control and irradiated samples. D, fibrin fiber density was calculated in control and irradiated  
 6 samples by counting fibers present within two horizontal lines drawn using Image J software. Data  
 7 are representative of three different sets of experiments (mean  $\pm$  SEM). \* $P < 0.05$  vs Control.  
 8

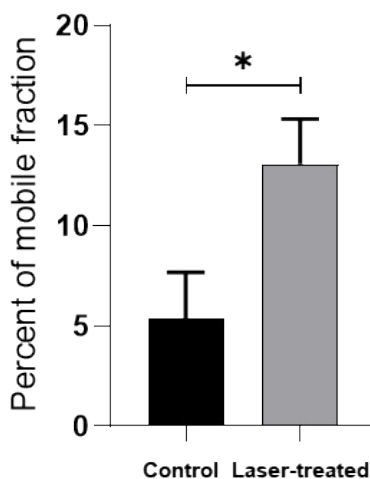

9  
 10 **Supplementary Figure 7. FRAP analysis of laser-irradiated in-stent clot.** Change in percent of  
 11 mobile fraction in control vs NIR laser-treated samples. Data are representative of three different  
 12 sets of experiments (mean  $\pm$  SEM). \* $P < 0.05$  vs Control.  
 13  
 14  
 15  
 16

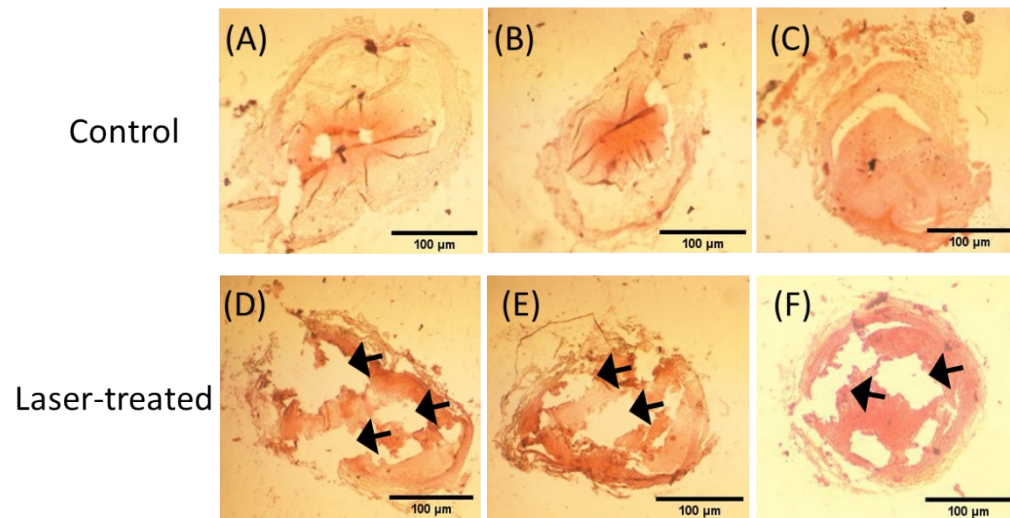

1  
2  
3  
4  
5  
6  
7  
8  
9  
10  
11

**Supplementary Figure 8.** Light microscopy images of hematoxylin- and eosin- stained transverse sections of stented carotid segments harvested post-surgery from control (A, B, and C) and NIR laser-irradiated (D, E, and F) animals (arrows indicating thrombus-depleted areas). Data are representative of three different sets of experiments.
